# Supplementary material
Source: PubMed Central journal article supplement (PMC2843187)
Supplement: supp_M109.095612_Suppdata.pdf [file supp_M109.095612_Suppdata.pdf]

S1

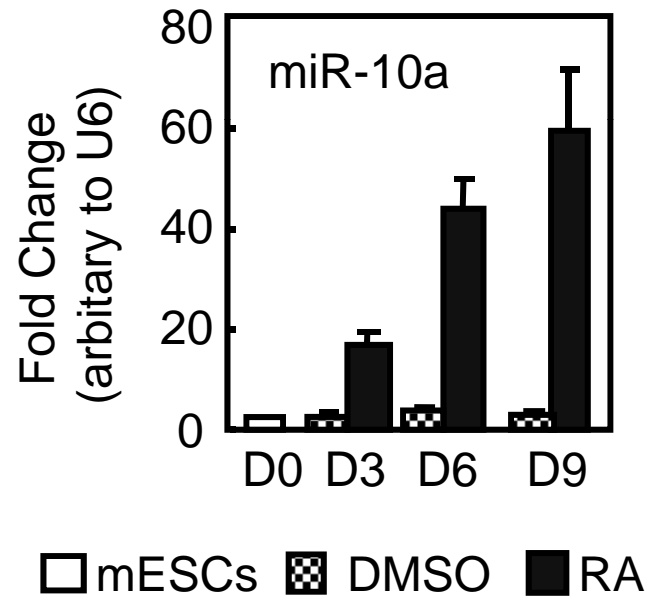

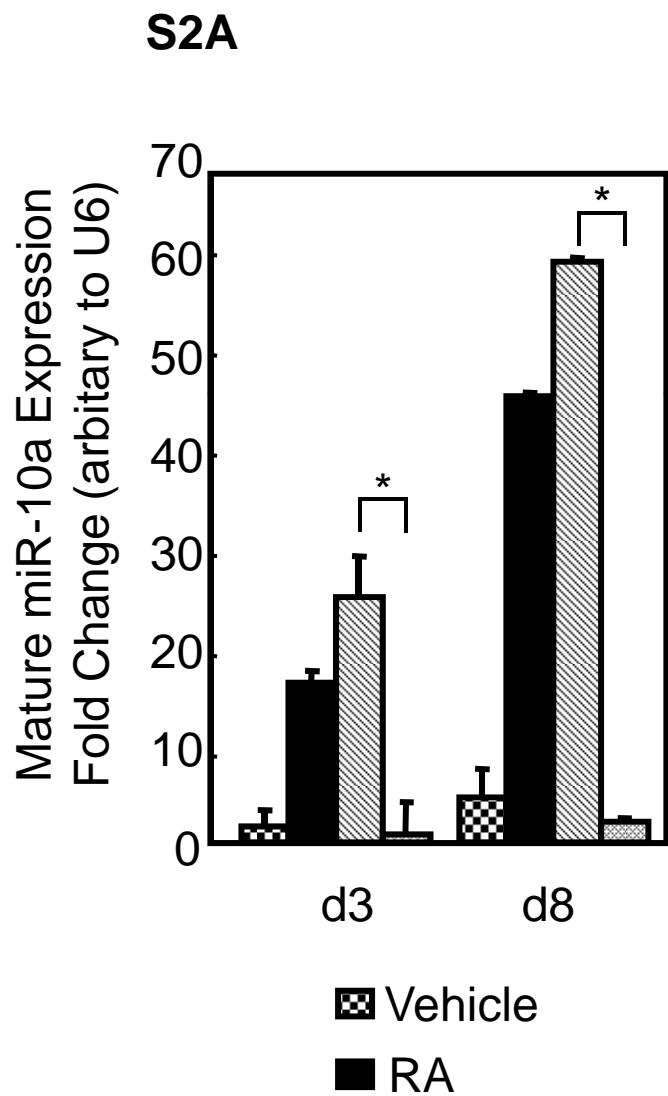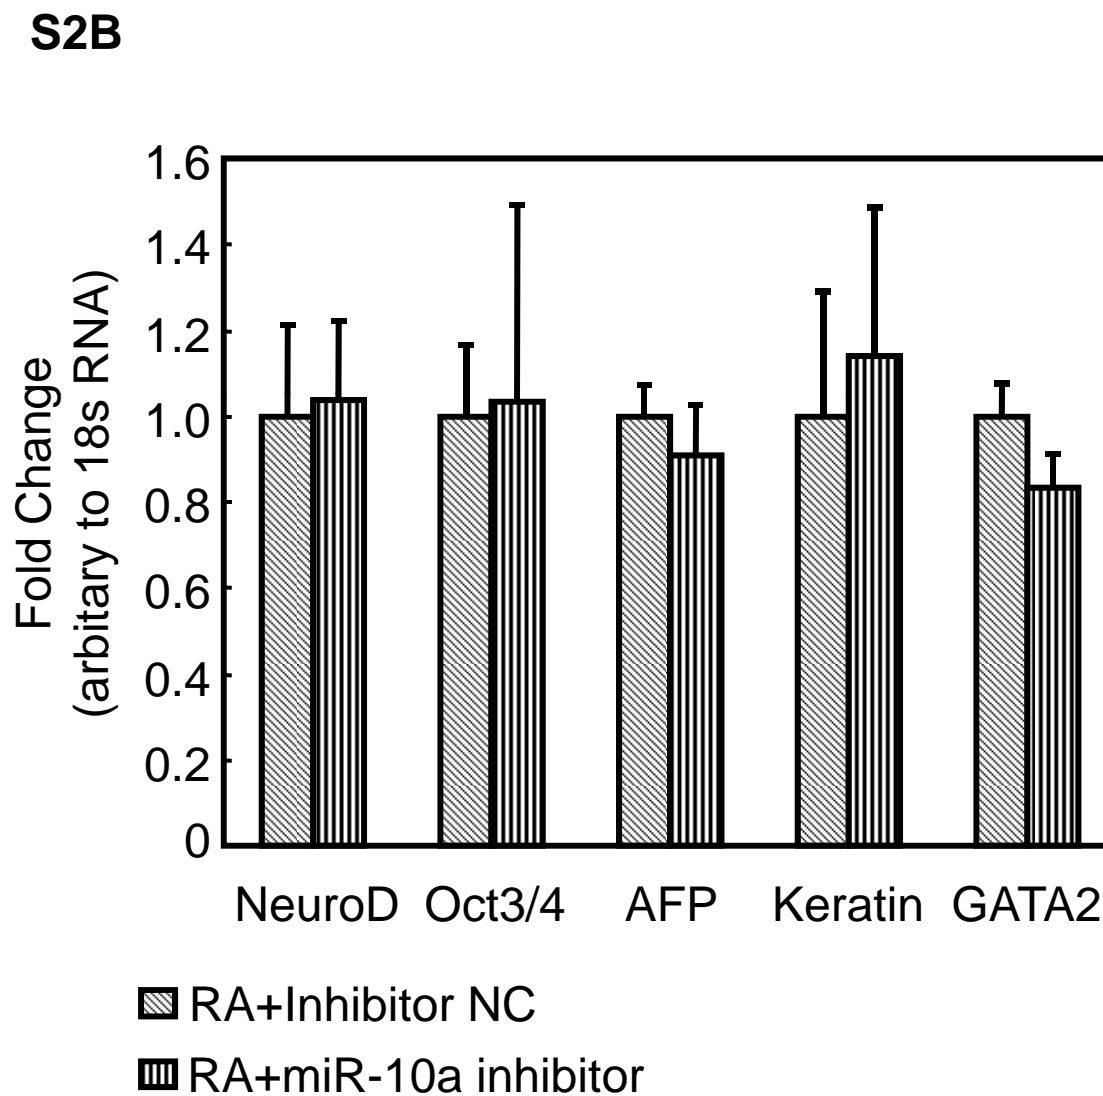

**S3A**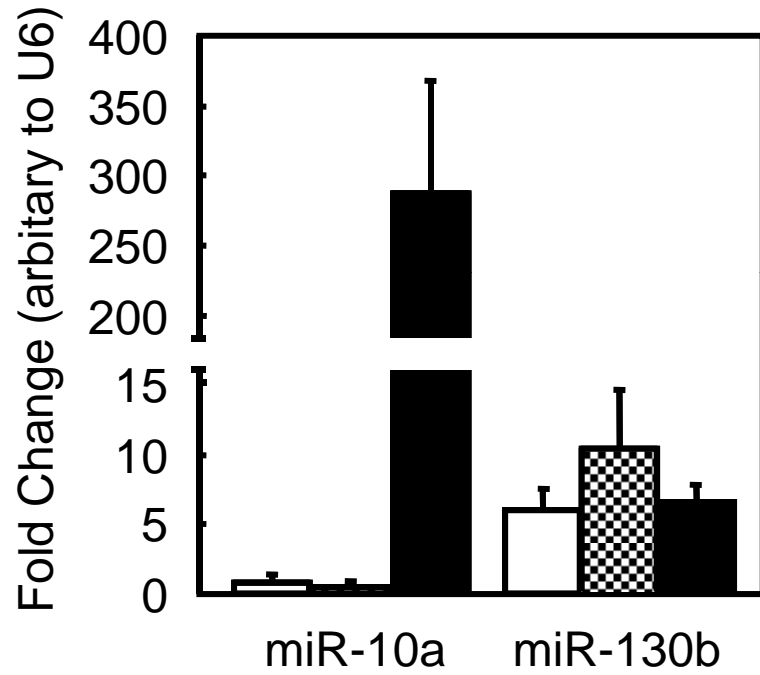**S3B**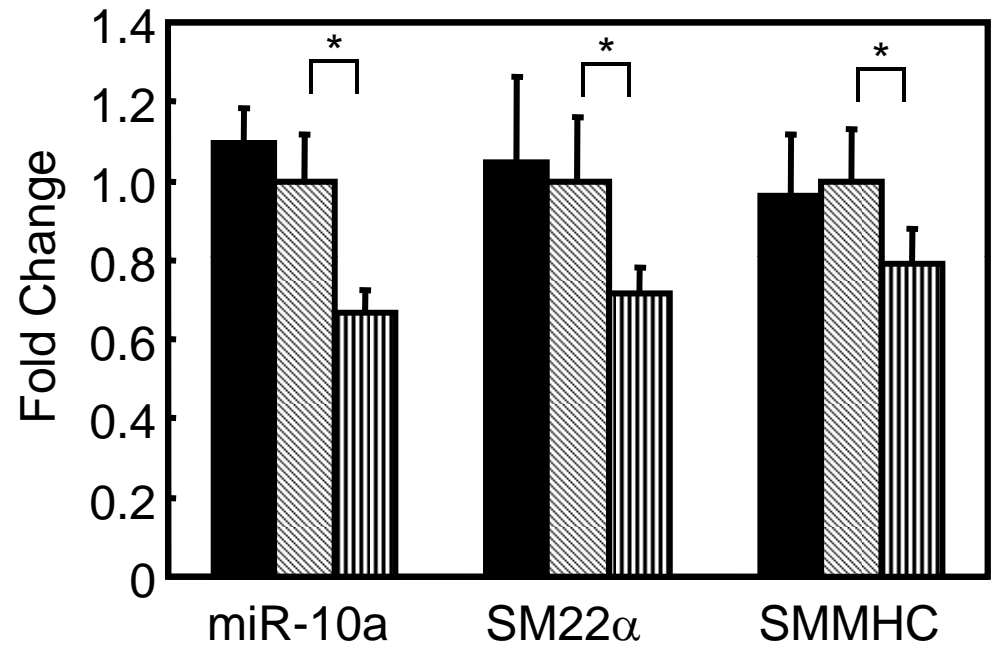

□ A404    ▣ Vehicle    ■ RA  
▨ RA+Inhibitor NC    ▤ RA+miR-10a inhibitor

**S3C**

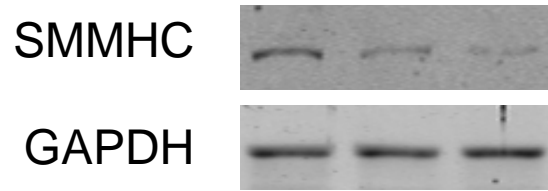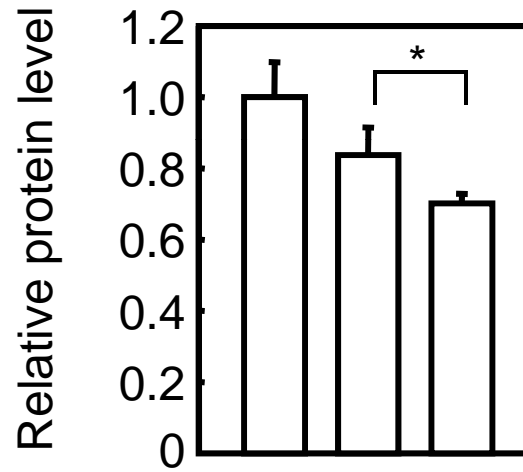

|                   |   |   |   |
|-------------------|---|---|---|
| RA( $10^{-6}$ M)  | + | + | + |
| Inhibitor NC      | - | + | - |
| miR-10a inhibitor | - | - | + |

### S4A

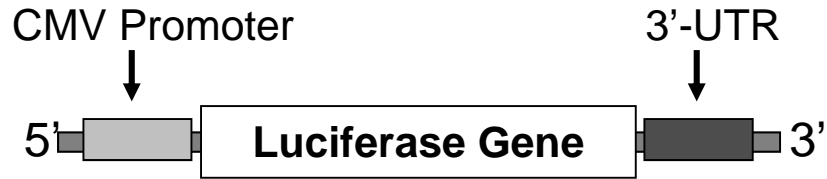

HDAC4 Wt 2321-2327 5' ....AAUUUGGUGGCAUUUACAGGGUA...

HDAC4 Mut 2321-2327 5' ....AAUUUGGUGGCAUUUACA**AAA**UA...

Mmu-miR-10a 3' UGUGUUUAAGCCAAGA--UGUCCCAU

### S4C

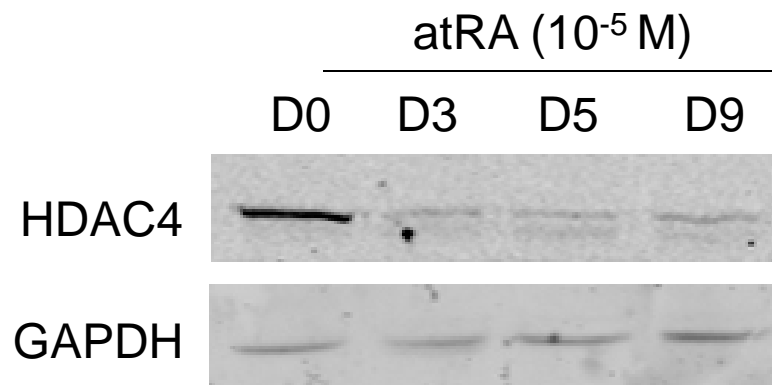

### S4B

mfe: -29.1 kcal/mol

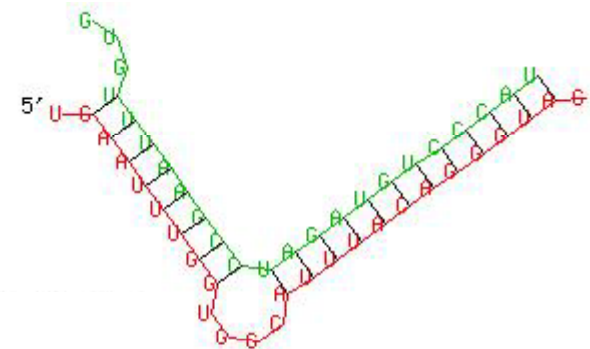

### S4D

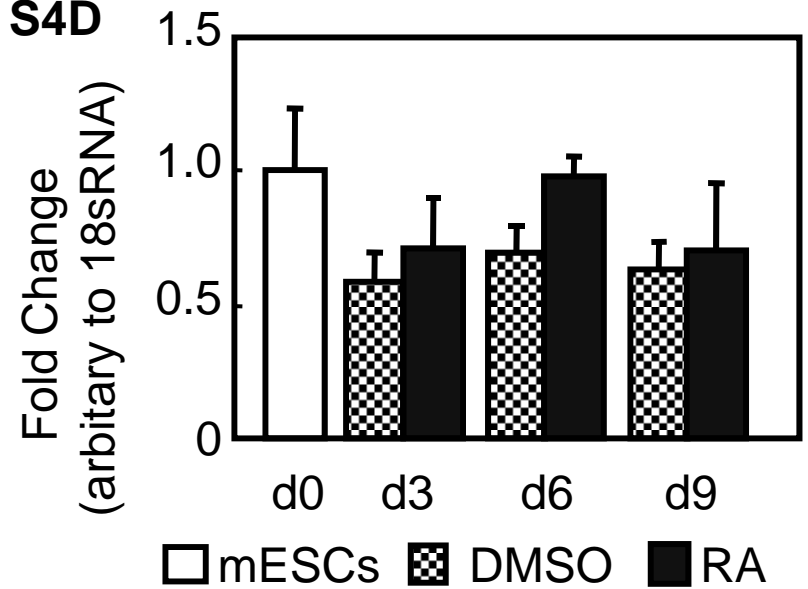

**S5A**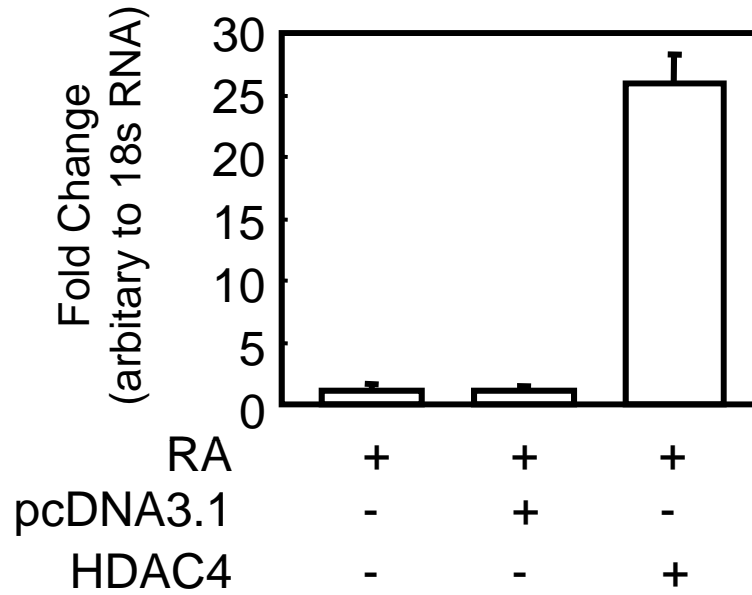**S5B**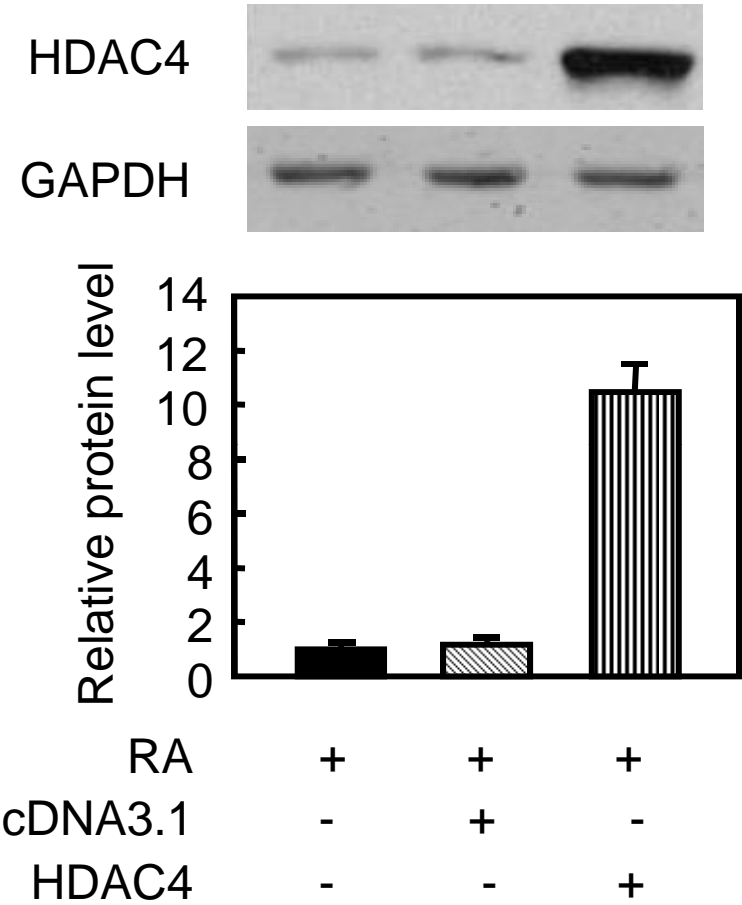**S5C**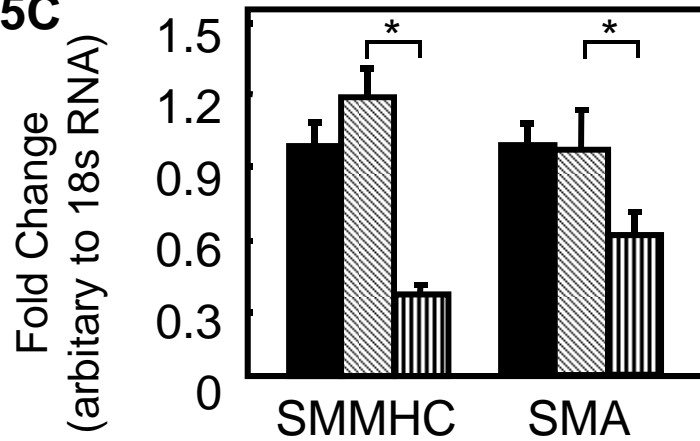

■ RA    ▨ RA+pcDNA3.1    ▤ RA+HDAC4

**S6A**

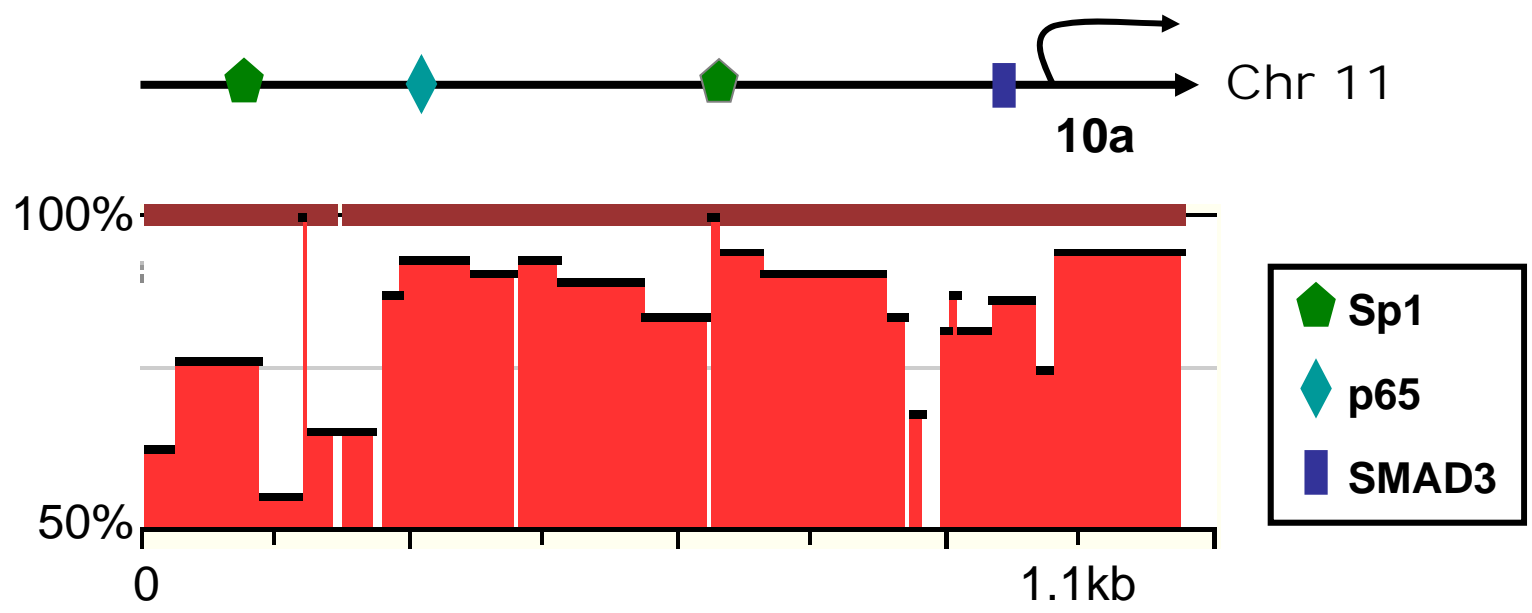

### S6B

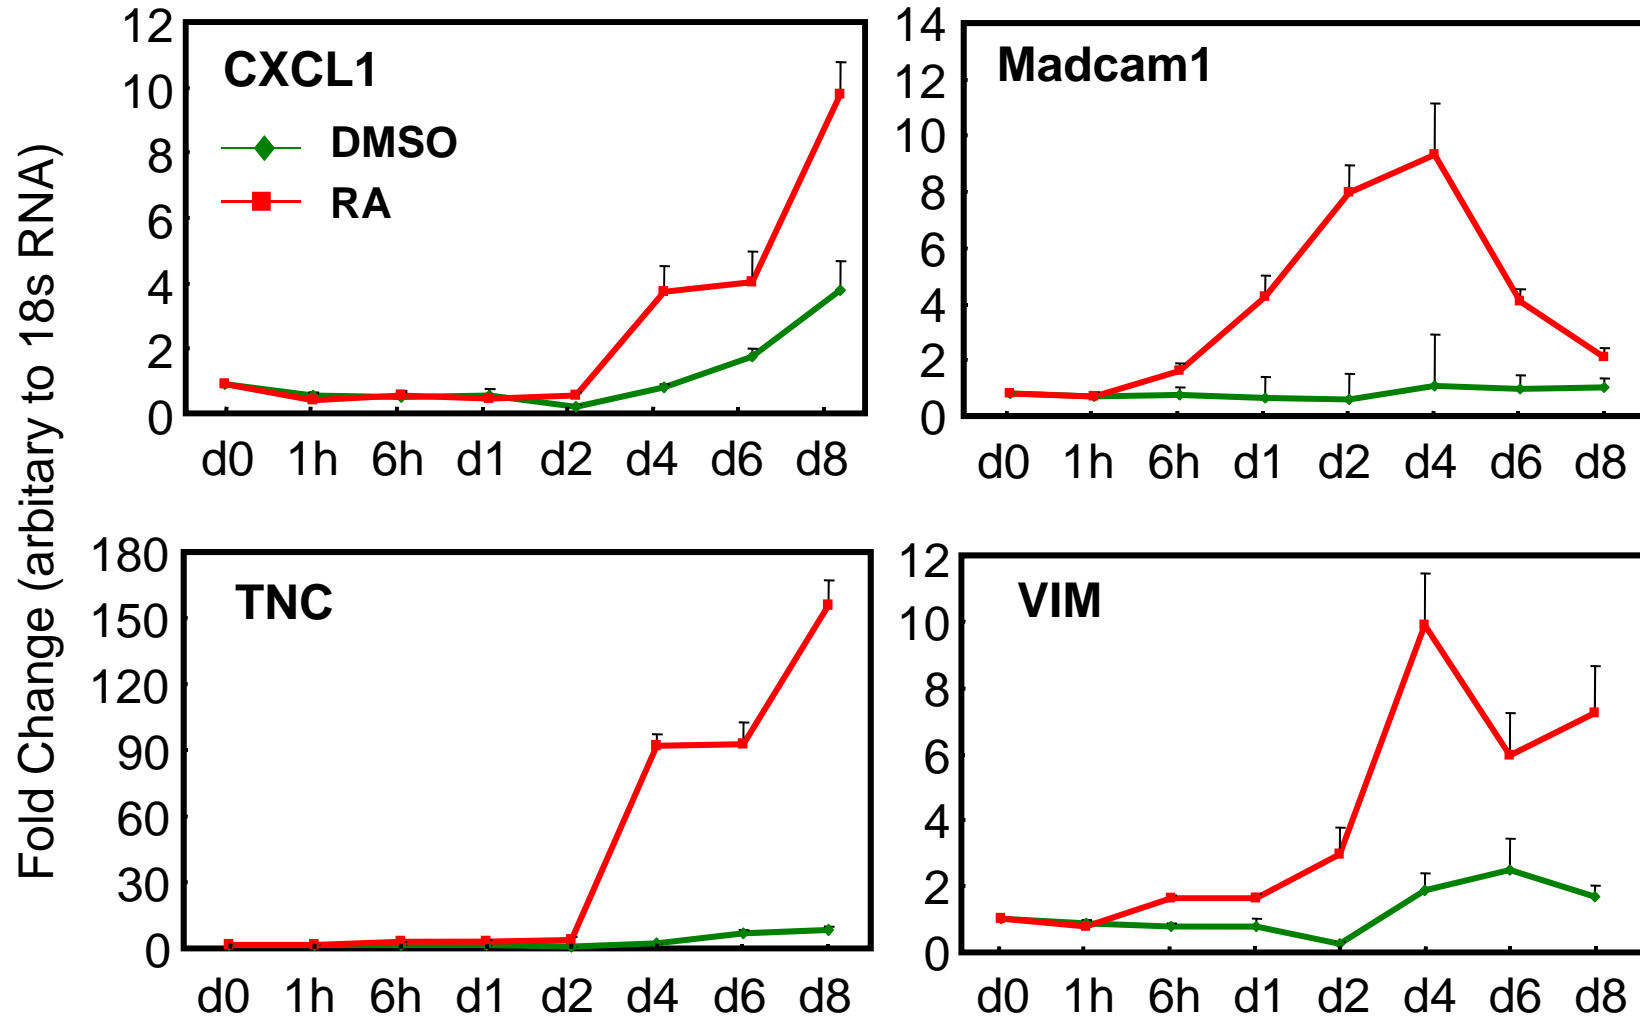



**Table S1: Primers used in this paper**

| <b>Gene</b>         | <b>Primer Sequence</b>                                                          | <b>Sequence ID</b> | <b>Product Size (bp)</b> |
|---------------------|---------------------------------------------------------------------------------|--------------------|--------------------------|
| 18S RNA             | forward: 5'-ggaagggcaccaccaggagt-3'<br>reverse: 5'-tgcagccccggacatctaag-3'      | NR_003278          | 317                      |
| Cnn2                | forward: 5'- gtgtgggctttggggtttc-3'<br>reverse: 5'- gaggcattggtgggtgagga-3'     | NM_007725          | 163                      |
| Cxcl1               | forward: 5'- gtgtgggaggctgtgtttgta-3'<br>reverse: 5'- gagcgagacgagaccaggag-3'   | NM_008176          | 113                      |
| Madcam1             | forward: 5'- ggcgacctggcaacctacc-3'<br>reverse: 5'- aagcagccccagcaccaa-3'       | NM_013591          | 207                      |
| SM22 $\alpha$       | forward: 5'-gatggaacaggtggctcaat-3'<br>reverse: 5'-tatgctcctgggctttcttc-3'      | NM_011526          | 210                      |
| SM- $\alpha$ -actin | forward: 5'-ggcatccacgaaaccacctat-3'<br>reverse: 5'-agccaccgatccagacagagta-3'   | NM_007392          | 214                      |
| Tnc                 | forward: 5'- ggggcccagagaaaagaa-3'<br>reverse: 5'- gaaccaccaagagaagtaaaa-3'     | NM_011607          | 249                      |
| Vim                 | forward: 5'- acccactcaaaaagaacactcc-3'<br>reverse: 5'- atctatcttgcgctcctgaaa-3' | NM_011701          | 214                      |

**Table S2:** List of miRNAs with more than 3 fold changes in expression level after RA-induced SMC differentiation for 3 days from mESCs

| <b>miRNAs</b> | <b>Fold change (log2)</b> |
|---------------|---------------------------|
| miR-10a       | 4.4                       |
| miR-338       | 3.4                       |
| miR-1         | 3.0                       |
| miR-133a      | 2.7                       |
| miR-23a       | 1.9                       |
| miR-155       | 1.8                       |
| miR-199a      | 1.7                       |
| miR-100       | 1.7                       |
| miR-99a       | 1.7                       |
| miR-335       | 1.6                       |
| miR-196b      | 1.6                       |
| miR-103       | -2                        |
| miR-290       | -2                        |
| miR-423       | -2                        |
| miR-328       | -3                        |
| miR-295       | -4                        |
| miR-130b      | -4                        |
| miR-302a      | -5                        |
